# Supplementary material for: Landscape of genome-wide age-related DNA methylation in breast tissue
Source: PubMed Central journal article supplement (PMC5777721; doi:10.18632/oncotarget.22754), 2017-11-29
Supplement: oncotarget-08-114648-s001.pdf [file oncotarget-08-114648-s001.pdf]

## Landscape of genome-wide age-related DNA methylation in breast tissue

### SUPPLEMENTARY MATERIALS

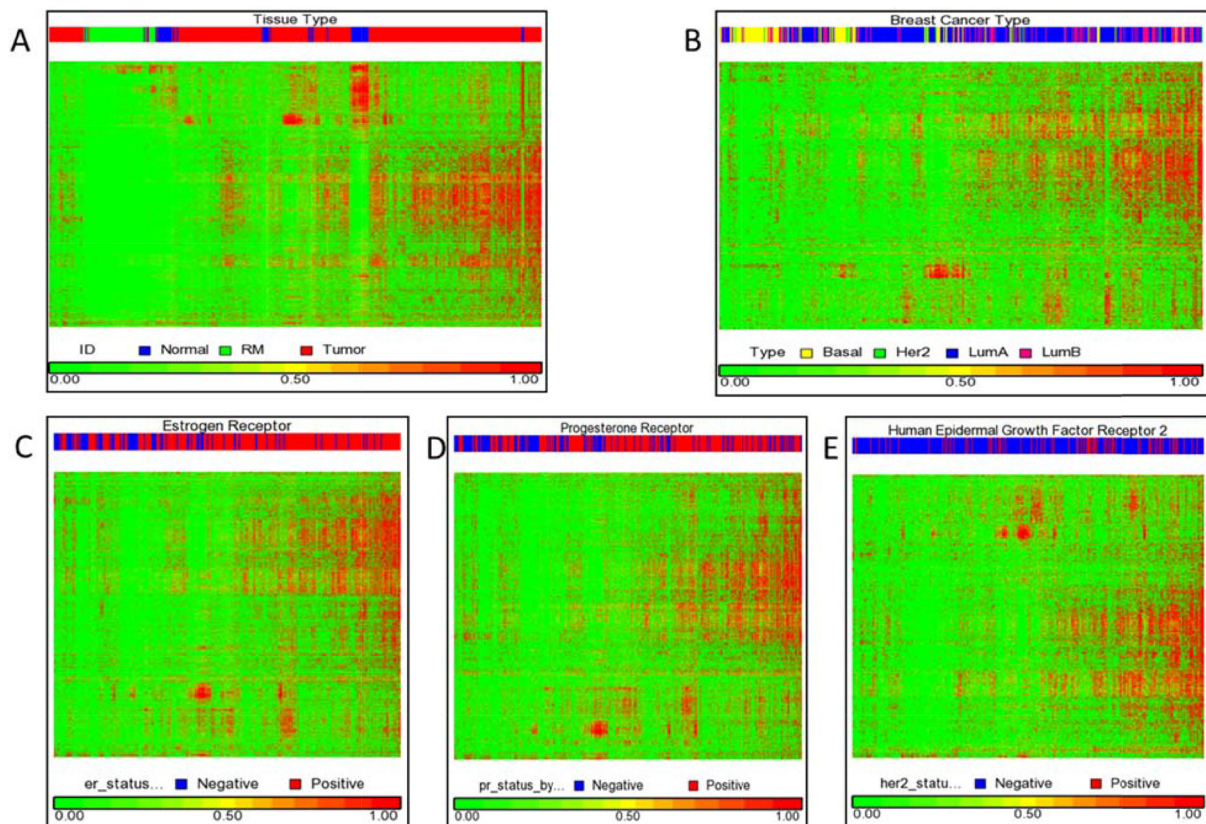

**Supplementary Figure 1: Unsupervised hierarchical clustering of beta-values for 1214 age-related DNA methylation identified from normal breast tissues (RM) from healthy women.** The clusters for 1214 aDNAm were performed by (A) tissue types; RM (green,  $n = 121$ ), 95 adjacent normal (Normal, blue,  $n = 95$ ), and Tumor tissues (red,  $n = 698$ ), (B) breast cancer types among tumors; Lumina A (blue,  $n = 251$ ), Luminal B (red,  $n = 106$ ), Negative/basal-like (yellow,  $n = 76$ ), and HER2 (green,  $n = 22$ ), and (C–E) hormone receptor status for ER (red for  $n = 507$  positive and blue for  $n = 149$  negative), PR (red for  $n = 441$  positive and blue for  $n = 212$  negative), and HER 2 (red for  $n=73$  positive and blue for  $n=351$  negative).

**Supplementary Table 1: A list of 1,214 age-related DNA methylation identified from normal breast tissues from healthy women ( $n = 121$ ).** See\_Supplementary\_Table 1

## Supplementary Table 2: The overlapping genomic location of aDNAm's with sites prone to mutation in human cancer

| Target ID                      | Overlapping gene | Chromosome | Location  | CpG Island | Enhancer | Functional location    | COSMIC ID   | CDS Mutation                               | Tumor Site                  |
|--------------------------------|------------------|------------|-----------|------------|----------|------------------------|-------------|--------------------------------------------|-----------------------------|
| <b>Loss methylation by age</b> |                  |            |           |            |          |                        |             |                                            |                             |
| cg19955284                     | SLC44A4          | 6          | 31833747  | S_Shelf    | NO       | Body                   | COSM241655  | c.1390G > A (Substitution)                 | Prostate and Liver          |
| <b>Gain methylation by age</b> |                  |            |           |            |          |                        |             |                                            |                             |
| cg02355885                     | ALK              | 2          | 30142990  | Island     | NO       | 1stExon                | COSM1182534 | c.536G > A (Substitution)                  | Large intestine             |
| cg23681664                     | CPNE9            | 3          | 9746637   | Island     | YES      | Body                   | COSM4158685 | c.220G > T (Substitution)                  | Thyroid                     |
| cg01844642                     | GPR62            | 3          | 51989764  | Island     | YES      | 1stExon                | COSM1424329 | c.96C > T (Substitution)                   | Large intestine             |
| cg18267374                     | NEFM             | 8          | 24771273  | Island     | NO       | TSS1500; 5'UTR;1stExon | COSM33641   | c.1-98_12del110 (Deletion - intronic)      | <b>Breast</b>               |
| cg07502389                     | NEFM             | 8          | 24771259  | Island     | NO       | TSS200; TSS1500        | COSM33641   | c.1-98_12del110 (Deletion - intronic)      | <b>Breast</b>               |
| cg14585700                     | PAX5*            | 9          | 37027605  | Island     | YES      | Body                   | COSM87055   | c.1-?_410+?del (Deletion)                  | Haematopoietic and Lymphoid |
| cg14484688                     | LRRRC8A          | 9          | 131669841 | N_Shore    | NO       | Body                   | COSM3327812 | c.398C > T (Substitution)                  | Central nervous system      |
| cg03799530                     | SH2B3            | 12         | 111843215 | Island     | NO       | TSS1500                | COSM1235306 | c.1_733-7575del21033 (Deletion - intronic) | Haematopoietic and Lymphoid |
| cg12639558                     | KDM2B            | 12         | 121958832 | Opensea    | NO       | Body                   | COSM144690  | c.1002C > G ( Substitution )               | Haematopoietic and Lymphoid |
| cg24051481                     | SOX21*           | 13         | 95364062  | Island     | NO       | 1stExon                | COSM948934  | c.242G > A ( Substitution )                | Endometrium                 |
| cg00991848                     | RPS2             | 16         | 2014270   | Island     | NO       | Body                   | COSM1609007 | c.267+6C > A (Substitution - intronic)     | Liver                       |
| cg08317252                     | STK11            | 19         | 1223163   | N_Shelf    | NO       | Body                   | COSM21358   | c.1100C > T (Substitution)                 | Large intestine             |
| cg21183502                     | PPP1R3D          | 20         | 58514581  | Island     | NO       | 1stExon                | COSM4135261 | c.406G > A (Substitution)                  | Pancreas                    |
| cg19841423                     | ZGPAT*           | 20         | 62366755  | S_Shore    | NO       | Body                   | COSM238471  | c.1296C > T (Substitution)                 | Prostate                    |

\*Transcription regulator  
Chr Chromosome

## Supplementary Table 3: The association of DNMT3A protein expression with 1,214 aDNAm's. See\_Supplementary\_Table 3

**Supplementary Table 4: Characteristics of TCGA-breast invasive carcinoma (BRCA) datasets**

| Characteristic            | Adjacent Normal ( <i>n</i> = 95),<br>Mean (SD) or <i>N</i> (%) |        | Tumors ( <i>n</i> = 698),<br>Mean (SD) or <i>N</i> (%) |        |
|---------------------------|----------------------------------------------------------------|--------|--------------------------------------------------------|--------|
| Age, years                | 57.7                                                           | (15.2) | 58.3                                                   | (13.1) |
| Race                      |                                                                |        |                                                        |        |
| European American         | 91                                                             | (96%)  | 552                                                    | (79%)  |
| African American          | 4                                                              | (4%)   | 146                                                    | (21%)  |
| Menopausal status         |                                                                |        |                                                        |        |
| Pre-menopausal            | 25                                                             | (31%)  | 155                                                    | (26%)  |
| Post-menopausal           | 55                                                             | (69%)  | 450                                                    | (74%)  |
| Missing                   | 15                                                             |        | 93                                                     |        |
| AJCC Stage                |                                                                |        |                                                        |        |
| Early (I, IIA, IIB, IIIA) | -                                                              | -      | 621                                                    | (89%)  |
| Late (IIIB, IV, V)        | -                                                              | -      | 75                                                     | (11%)  |
| Missing                   | -                                                              | -      | 2                                                      |        |
| Tumor type                |                                                                |        |                                                        |        |
| Luminal A                 | -                                                              | -      | 251                                                    | (55%)  |
| Luminal B                 | -                                                              | -      | 106                                                    | (23%)  |
| Basal                     | -                                                              | -      | 76                                                     | (17%)  |
| HER2                      | -                                                              | -      | 22                                                     | (5%)   |
| Missing                   | -                                                              | -      | 338                                                    |        |
| ER                        |                                                                |        |                                                        |        |
| Positive                  | -                                                              | -      | 507                                                    | (77%)  |
| Negative                  | -                                                              | -      | 149                                                    | (23%)  |
| Missing                   | -                                                              | -      | 42                                                     |        |
| PR                        |                                                                |        |                                                        |        |
| Positive                  | -                                                              | -      | 441                                                    | (68%)  |
| Negative                  | -                                                              | -      | 212                                                    | (32%)  |
| Missing                   | -                                                              | -      | 45                                                     |        |
| HER2                      |                                                                |        |                                                        |        |
| Positive                  | -                                                              | -      | 73                                                     | (17%)  |
| Negative                  | -                                                              | -      | 351                                                    | (89%)  |
| Missing                   | -                                                              | -      | 274                                                    |        |

**Supplementary Table 5: A list of replicated aDNAm's in the TCGA dataset and differentially methylated aDNAm's by hormone receptor status. See\_Supplementary\_Table 5**
